# Supplementary material
Source: publisher figshare collection journal article supplement (https://acs.figshare.com/ndownloader/files/4093219)
Supplement: Supplementary file 1 [file 4093219]

# Luminescent Metallogels of Bis-Cyclometalated Alkynylgold(III) Complexes

*Vonika Ka-Man Au, Nianyong Zhu, and Vivian Wing-Wah Yam\**

Institute of Molecular Functional Materials<sup>†</sup> and Department of Chemistry,

The University of Hong Kong, Pokfulam Road, Hong Kong

E-mail: wwyam@hku.hk

<sup>†</sup>Areas of Excellence Scheme, University Grants Committee (Hong Kong)

**Supporting Information**

(a)

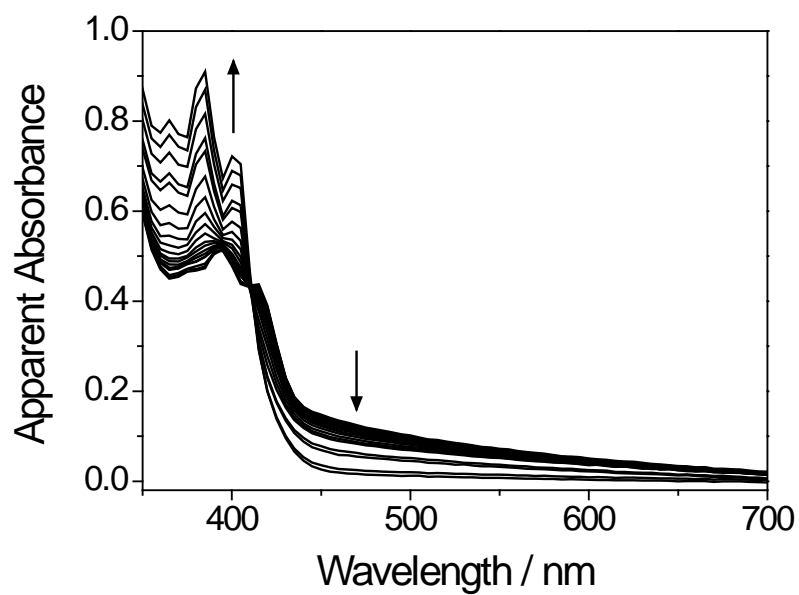

(b)

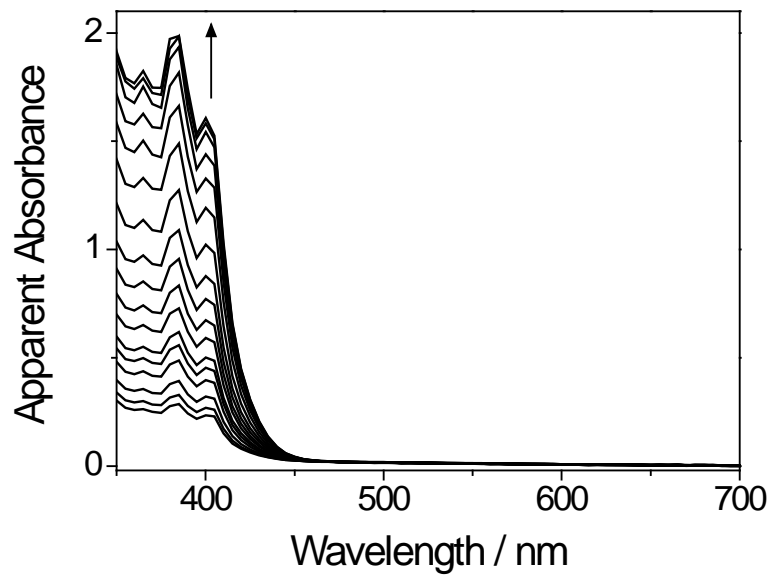

**Figure S1** UV-Vis absorption spectral traces of the sol-gel phase transition of complex **4** in cyclohexane upon increasing the temperature from (a) 10 to 35°C and (b) 35 to 75 °C

(a)

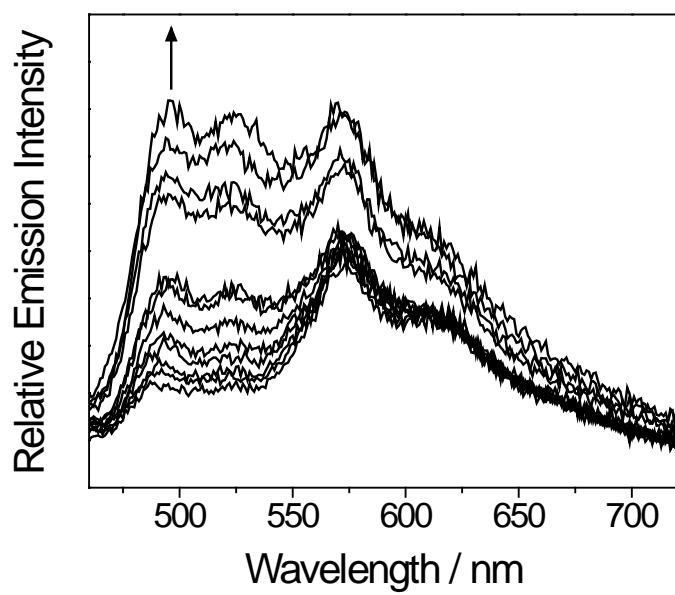

(b)

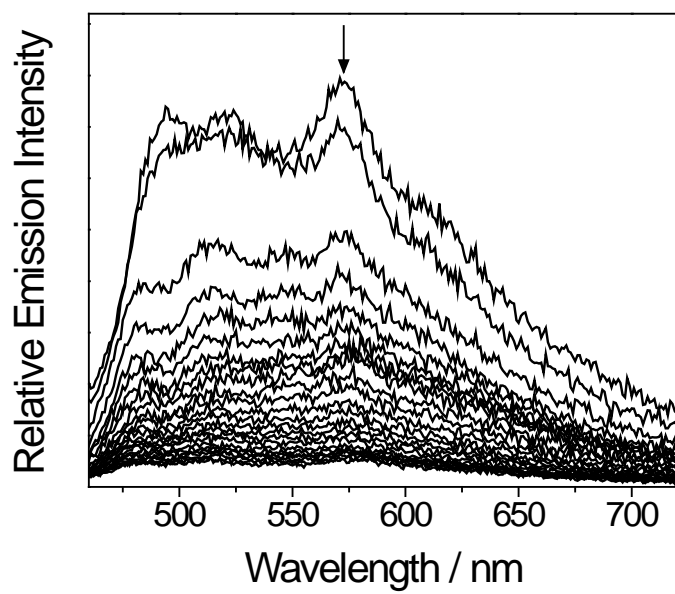

**Figure S2** Corrected emission spectra of the cyclohexane gel of complex **4** upon increasing the temperature (a) from 10 to 30 °C and (b) from 30 to 80 °C
